# Supplementary material
Source: PubMed Central journal article supplement (PMC1934533)

# Supplemental figure S1

A

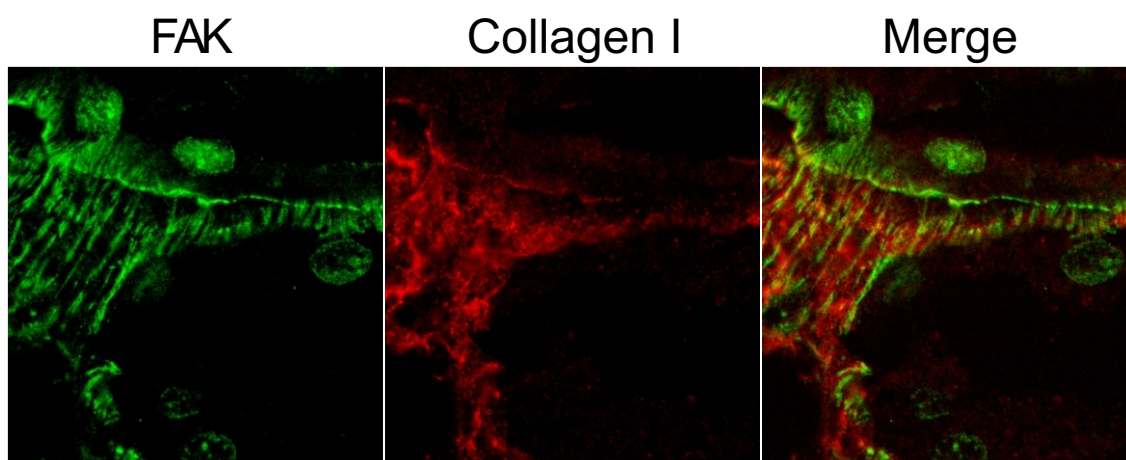

B

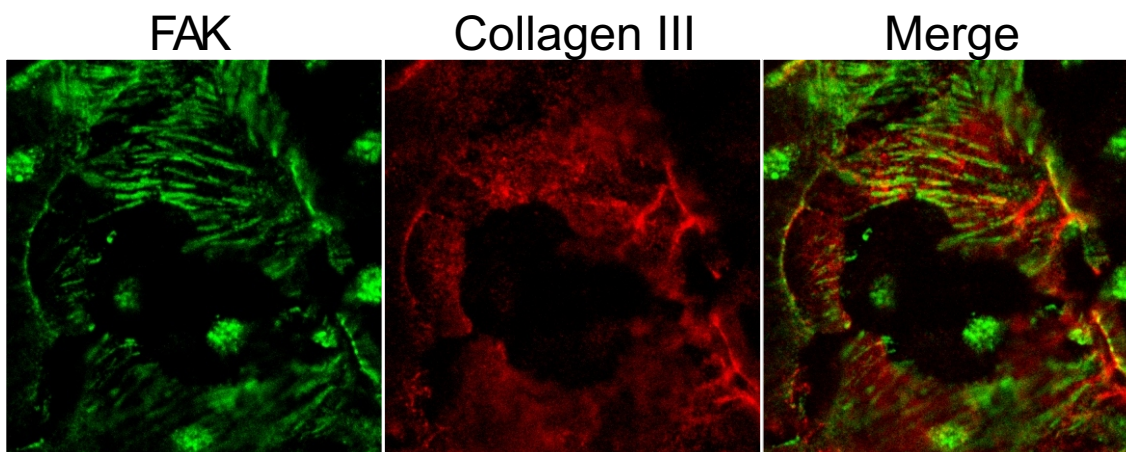

# Supplemental figure S2

A

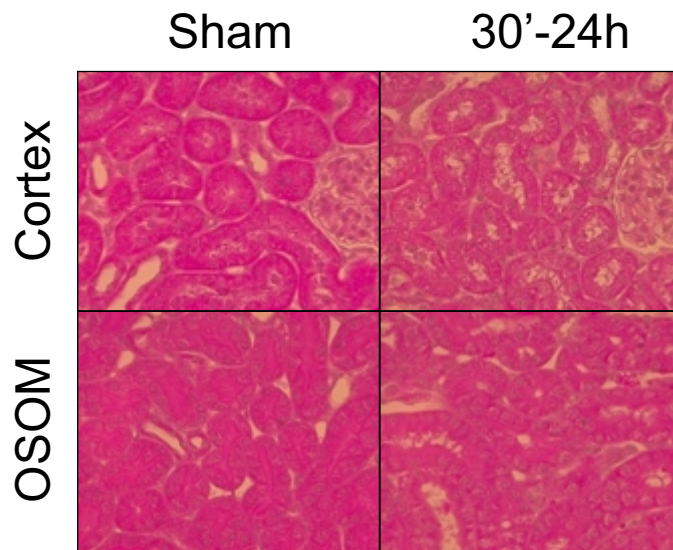

B

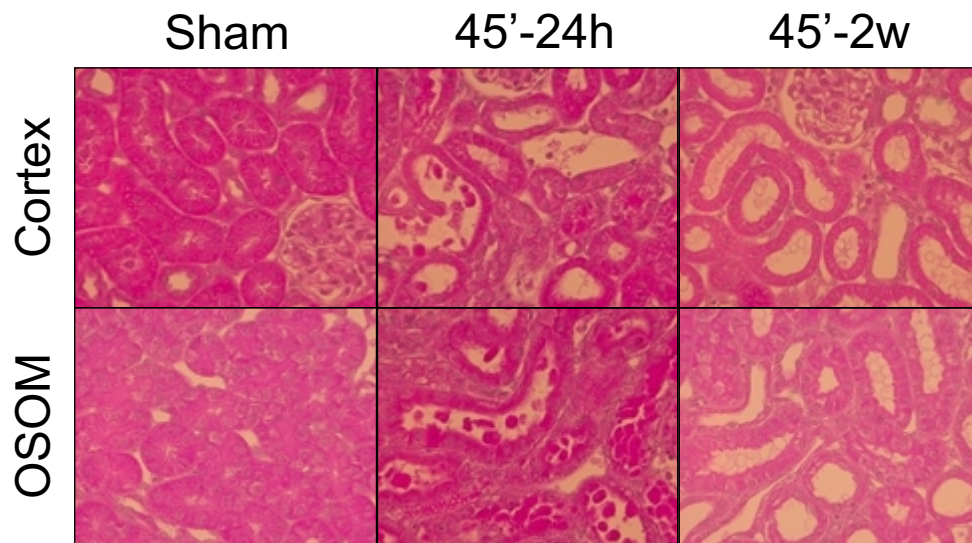

# Supplemental figure S3

Reperfusion time

A

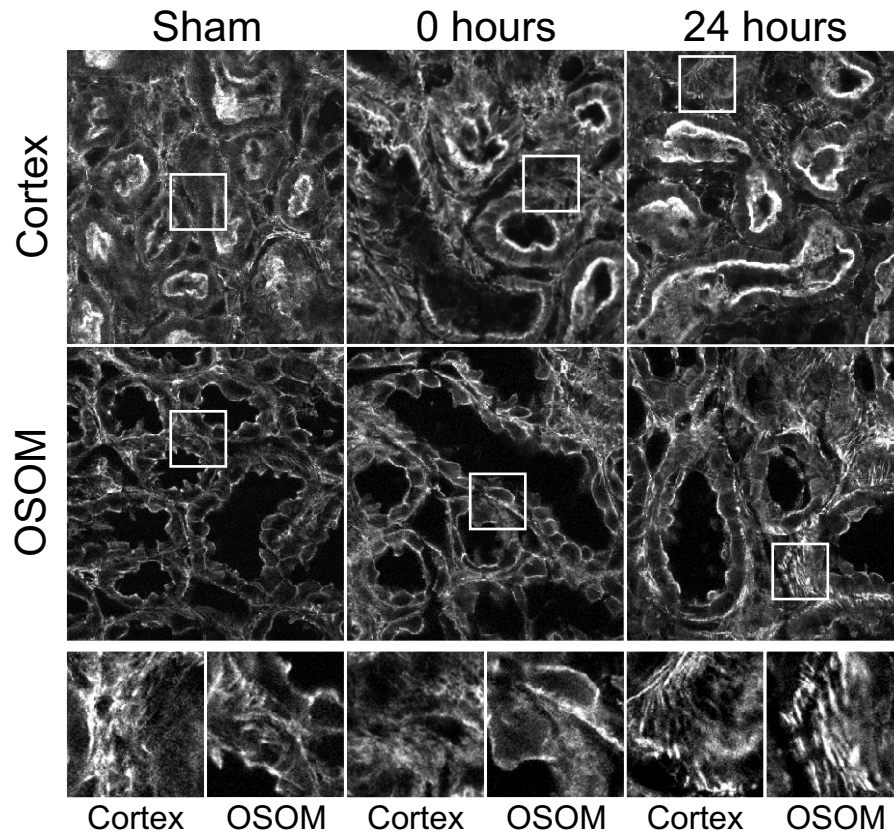

B

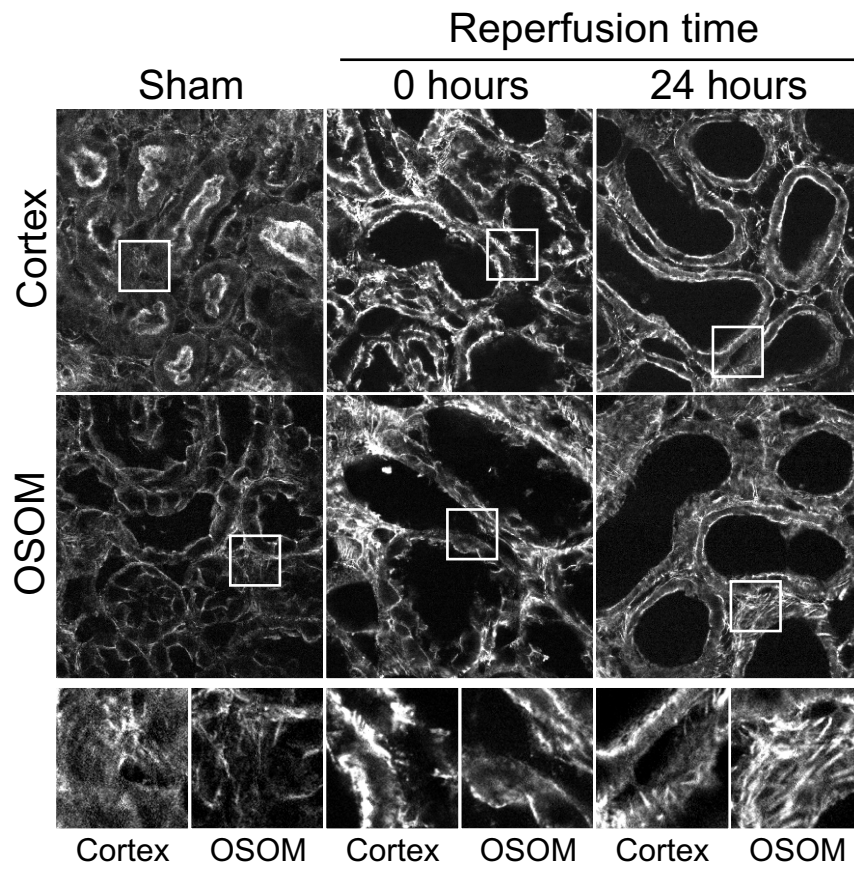

Supplement: amjpathol_ajpath.2007.060805_1.pdf [file amjpathol_ajpath.2007.060805_1.pdf]
